# Supplementary material
Source: publisher figshare collection journal article supplement (https://gsajournals.figshare.com/articles/dataset/_/8343863)

1 **Supplementary Figure 1.** Crossing scheme for introgression of *scd*<sup>1</sup> into the FVW wild-  
2 type genetic background. (A) Initial introgression of *scd*<sup>1</sup> into FVW to establish the *scd*<sup>\*</sup>  
3 population. White bars represent the original genetic background of the *scd*<sup>1</sup> stock  
4 strain; gray bars represent the FVW genetic background. (B) Further backcrossing  
5 using larger numbers of flies to introduce additional genetic diversity from FVW to  
6 establish the *scd*<sup>\*\*</sup> base population for experimental evolution. Here gray bars represent  
7 the FVW genetic background of the *scd*<sup>\*</sup> population, while colored bars represent a  
8 more variable genetic background resulting from further backcrosses to the FVW  
9 population conducted in large numbers. See Methods section for detailed description of  
10 introgression scheme.

A

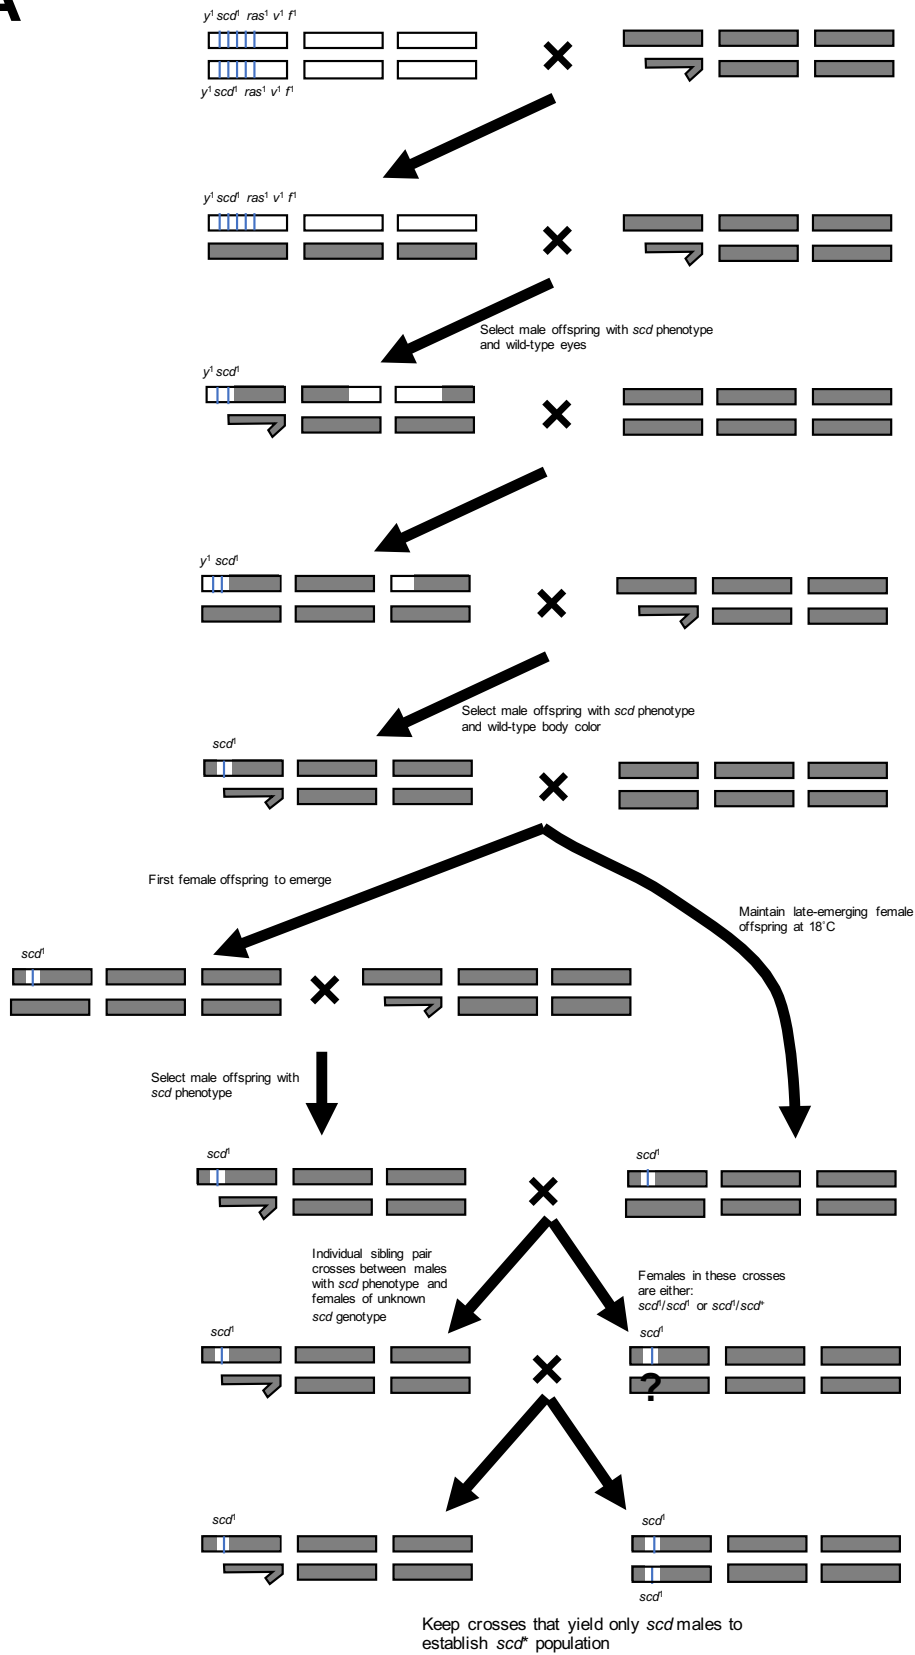

B

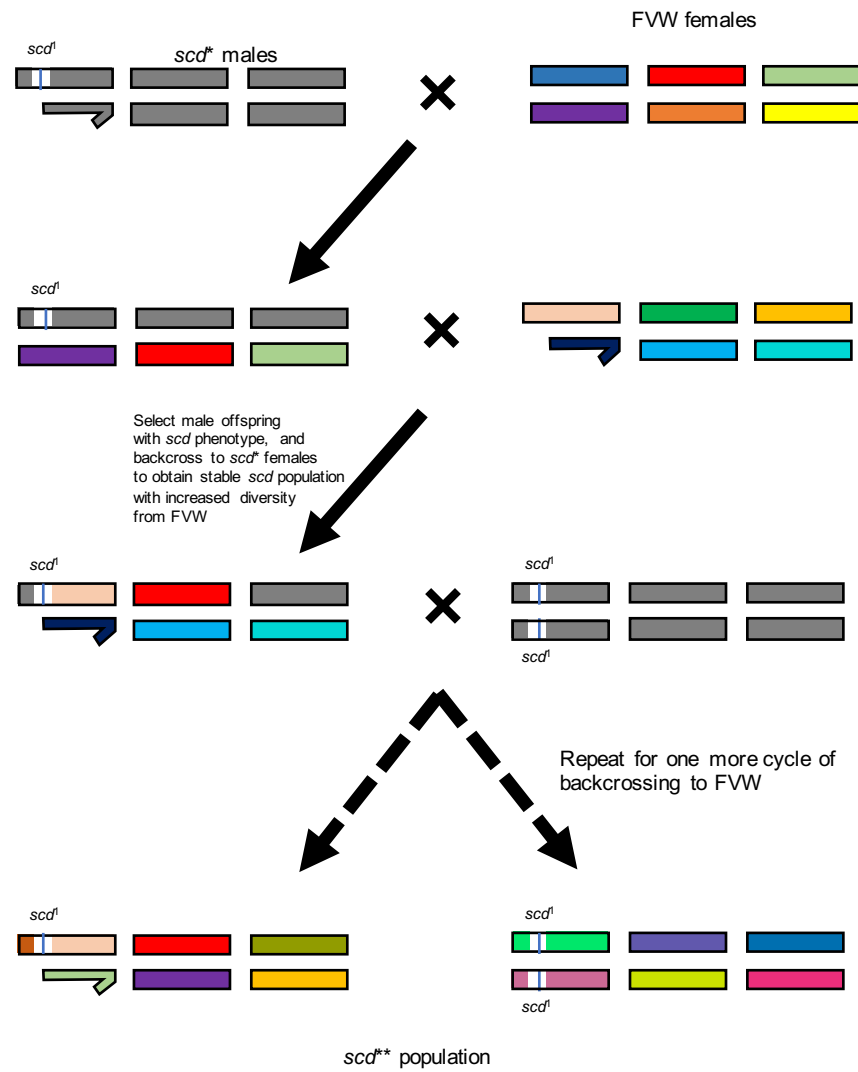

Supplement: Supplementary file 1 [file 2]
